# Supplementary material
Source: HighWire-hosted journal article supplement (https://www.haematologica.org/content/suppl/2014/10/01/haematol.2014.104760)

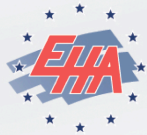

EUROPEAN  
HEMATOLOGY  
ASSOCIATION

 **haematologica**

Journal of the European Hematology Association  
Owned & published by the Ferrata Storti Foundation

## AUTHOR CONTRIBUTION FORM

|                     |                                                                                                                                     |
|---------------------|-------------------------------------------------------------------------------------------------------------------------------------|
| <b>Title</b>        | <i>Response to azacitidine is independent of p53 expression in higher-risk myelodysplastic syndromes and acute myeloid leukemia</i> |
| <b>First author</b> | <i>Catharina Müller-Thomas</i>                                                                                                      |

According to the International Committee of Medical Journal Editors (ICMJE)

([http://www.icmje.org/ethical\\_1author.html](http://www.icmje.org/ethical_1author.html)):

*“Authorship credit should be based on: 1) substantial contributions to conception and design, acquisition of data, or analysis and interpretation of data; 2) drafting the article or revising it critically for important intellectual content; and 3) final approval of the version to be published. Authors should meet conditions 1, 2 and 3. Acquisition of funding, collection of data, or general supervision of the research group alone does not constitute authorship”.*

**The responsible author of this manuscript confirms that all persons designated as authors qualify for authorship, and that each author has participated sufficiently in the work to take public responsibility for appropriate portions of the content.**

|                                                                                                  |
|--------------------------------------------------------------------------------------------------|
| <b>Responsible author</b> ( <i>author responsible for the integrity of the work as a whole</i> ) |
| Name: Katharina Götze                                                                            |
| Institute: III. Dept. of Medicine, Technical University of Munich, Munich, Germany               |
| e-mail: k.goetze@lrz.tum.de                                                                      |

### **Author contributions**

*Please describe the contributions of each author, indicating who was responsible for each part of the study and the preparation of the manuscript (collection of data, experiments, data analysis, generation of figures, interpretation of data, preparation of the text, etc.) :*

CMT, MR and KG designed the study, analyzed data and wrote the paper. CMT and RB were responsible for clinical data management. CMT, CH, BS, MK, UG, UP, CP and KG contributed patient samples and clinical data. IR performed statistical analysis. MR performed p53 IHC and *TP53* sequencing. TH performed cytogenetics and *TP53* mutation analysis. JS evaluated cytogenetics.

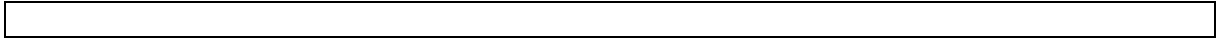

Supplement: 2014_104760-Contributions.pdf [file 2014_104760-Contributions.pdf]
